# Supplementary material for: Ligand-dependent Ag2S formation: changes in deposition of silver nanoparticles with sulfidation
Source: Royal Society of Chemistry journal article supplement (doi:10.1039/c7en01240c), 2018-01-01
Supplement: c7en01240c1.pdf [file c7en01240c1.pdf]

## Supplementary Information

### **Ligand-Dependent Ag<sub>2</sub>S Formation: Changes in Deposition of Silver Nanoparticles with Sulfidation**

Michael L. Nguyen<sup>a</sup>, Joseph A. Murphy<sup>b</sup>, Leigh C. Hamlet<sup>b</sup>, Boris L. T. Lau<sup>ab</sup>

<sup>a</sup>*Department of Geosciences, University of Massachusetts Amherst, 611 N. Pleasant St., Amherst, MA 01002, USA*

<sup>b</sup>*Department of Civil & Environmental Engineering, University of Massachusetts Amherst, 130 Natural Resources Road, Amherst, MA 01003, USA*

Correspondence: Boris L. T. Lau

E-mail: [borislau@umass.edu](mailto:borislau@umass.edu)

Pages: 4

Figures and Tables: 3

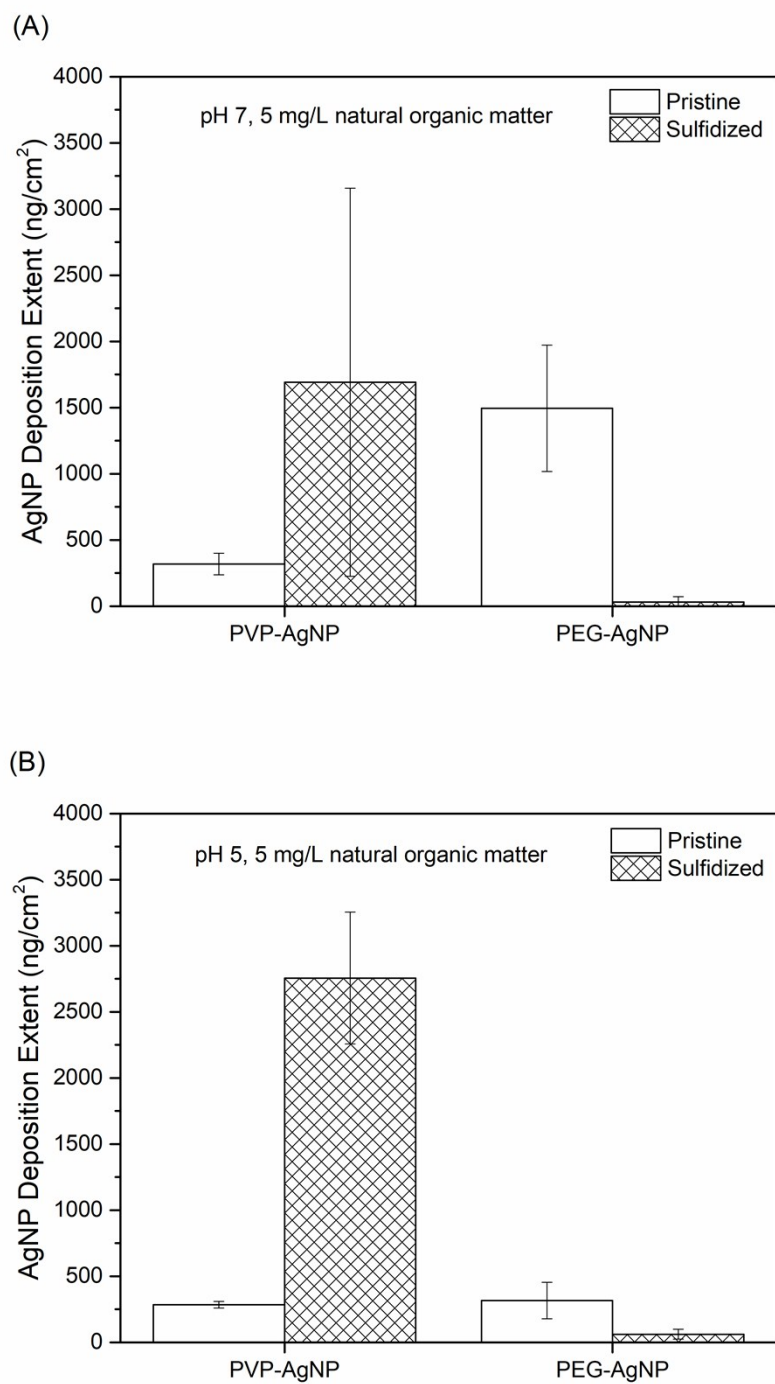

**Figure S1.** The deposition of PVP- and PEG-capped AgNPs in the pristine and sulfidized states onto QCM silica sensors in 5 mM NaNO<sub>3</sub> and 5 mg/L natural organic matter at (A) pH 7 and (B) pH 5.

| <b>Treatment</b> | <b>Ligand-NPs</b> | <b>C %</b> | <b>N %</b> |
|------------------|-------------------|------------|------------|
| Pristine         | PEG-AgNPs         | 63.8       | 0.10       |
| Sulfidized       |                   | 19.3       | 0.10       |
| Pristine         | PVP-AgNPs         | 71.3       | 10.5       |
| Sulfidized       |                   | 32.6       | 2.30       |

**Table S1.** The atomic C and N% of PVP- and PEG-capped AgNPs in the pristine and sulfidized states determined through XPS.

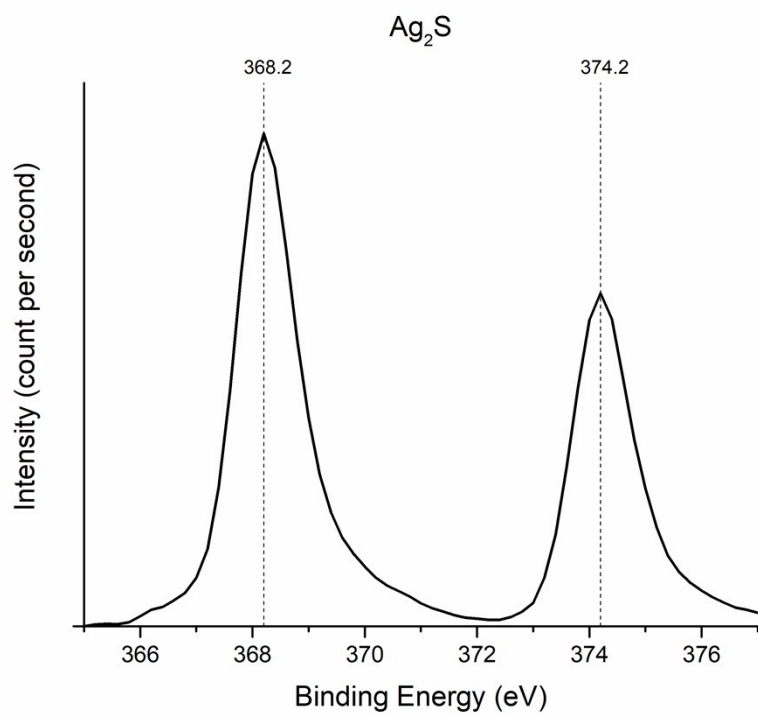

**Figure S2.** The  $\text{Ag}_{3d5/2}$  and  $\text{Ag}_{3d3/2}$  XPS spectra of  $\text{Ag}_2\text{S}$ .
